## Correction: Checkpoint inhibitor induced cardiotoxicity: managing the drawbacks of our newest agents against cancer

**Karina Brüstle and Bettina Heidecker**

**Published:** September 07, 2018

**Copyright:** Brüstle et al. This is an open-access article distributed under the terms of the Creative Commons Attribution License 3.0 (CC BY 3.0), which permits unrestricted use, distribution, and reproduction in any medium, provided the original author and source are credited.

**This article has been corrected:** The correct reference 5 is given below:

5. Berg JK, et al. Circulation Heart Failure. 2017; 10.

Original article: Oncotarget. 2017; 8:106165-106166. <https://doi.org/10.18632/oncotarget.22579>
